# Supplementary material for: Sex differences in health services and medication use among older adults with asthma
Source: PubMed Central journal article supplement — ERJ Open Res. 2019 Dec 2;5(4):00242-2019. doi: 10.1183/23120541.00242-2019 (PMC6885592; doi:10.1183/23120541.00242-2019), 2019-12-02
Supplement: 00242-2019.Supplement.pdf [file 00242-2019.Supplement.pdf]

**Online Supplement.** Adjusted relative rates of asthma-specific health services use and prescriptions for women vs. men

*a) Negative binomial regression models*

| Outcome                                 | Crude RR (95% CI)               |          | Adjusted RR (95% CI)            |          |
|-----------------------------------------|---------------------------------|----------|---------------------------------|----------|
|                                         | Study Population<br>(N=209,054) | P-Value† | Study Population<br>(N=209,054) | P-Value† |
| <b>Asthma-Specific HSU</b>              |                                 |          |                                 |          |
| Spirometry visits                       | 0.79 (0.77, 0.81)               | <0.0001  | 0.87 (0.85, 0.89)               | <0.0001  |
| Asthma-specific ED visits               | 0.99 (0.88, 1.11)               | 0.8400   | 1.43 (1.33, 1.53)               | <0.0001  |
| Asthma-specific hospitalizations*       |                                 |          |                                 |          |
| Asthma-specific physician office visits | 0.97 (0.95, 0.99)               | 0.0071   | 1.03 (1.01, 1.05)               | 0.0007   |
| Asthma-specific specialist visits       | 0.93 (0.89, 0.96)               | 0.0005   | 0.93 (0.90, 0.96)               | <0.0001  |
| <b>Asthma-Specific Medication Use</b>   |                                 |          |                                 |          |
| Asthma controller prescriptions         | 0.88 (0.87, 0.89)               | <0.0001  | 0.98 (0.97, 0.99)               | 0.0227   |
| Asthma reliever prescriptions           | 0.91 (0.89, 0.92)               | <0.0001  | 1.03 (1.02, 1.05)               | 0.0002   |

The multivariate negative binomial regression models were adjusted for age at baseline, age at asthma prevalence, collapsed aggregated diagnosis groups (CADGs), Ontario Marginalization Index, local health integration networks (LHINs), rurality, and chronic obstructive pulmonary disease (COPD); offset by log(years observed). RR: relative rate. CI: confidence interval. HSU: health services use. ED: emergency department. †: P<0.05 considered statistically significant. \*: The negative binomial regression model did not converge.

*b) Logistic regression model*

| Outcome                          | Crude OR (95% CI)               |          | Adjusted OR (95% CI)            |          |
|----------------------------------|---------------------------------|----------|---------------------------------|----------|
|                                  | Study Population<br>(N=209,054) | P-Value† | Study Population<br>(N=209,054) | P-Value† |
| <b>Asthma-Specific HSU</b>       |                                 |          |                                 |          |
| Asthma-specific hospitalizations | 2.03 (1.89, 2.19)               | <0.0001  | 2.31 (2.14, 2.49)               | <0.0001  |

The logistic regression model was adjusted for age at baseline, age at asthma prevalence, collapsed aggregated diagnosis groups (CADGs), Ontario Marginalization Index, local health integration networks (LHINs), rurality, and chronic obstructive pulmonary disease (COPD); offset by log(years observed). OR: odds ratio. CI: confidence interval. HSU: health services use. †P<0.05 considered statistically significant.
